# Supplementary material for: Tn5/7-lux: a versatile tool for the identification and capture of promoters in Gram-negative bacteria
Source: PubMed Central journal article supplement (PMC4328036; doi:10.1186/s12866-015-0354-3), 2015-02-04
Supplement: 12866_2015_354_MOESM1_ESM.pdf [file 12866_2015_354_MOESM1_ESM.pdf]

## **Additional methods**

**Linker tailing procedure.** For linker tailing, approximately 1 µg of plasmid DNA was digested using the appropriate restriction enzyme(s) and cleaned using the Gen Elute Gel Extraction Kit (Sigma-Aldrich, St. Louis, MO). The non-phosphorylated linker oligonucleotides were pre-hybridized by mixing in sterile deionized water at a concentration of 0.1-0.5 µg/µl, boiling for 1 min, and cooling at room temperature for 2-3 h. Half of the digested plasmid DNA was ligated with 100X molar excess of linker. The ligations were conducted for either 4 h at room temperature or overnight at 14°C. The ligation mixtures were subsequently heated to 65-70°C for 5-10 min and then electrophoresed on a 1% agarose gel. The linear ligation product was purified from the gel using the Gen Elute Gel Extraction Kit (Sigma-Aldrich) and resuspended in 100 µl of hybridization buffer (10 mM Tris-HCl [pH 7.5], 100 mM NaCl, 1 mM EDTA). This mixture was then heated at 80°C for 5 min in a dry-block heater, the heater shut off and the solution slowly cooled overnight to room temperature. 10-20 µl of the annealing mixture was used directly for transformation.

**Construction of pTn7xLuxG0.** The mini-Tn7 delivery vector pUC18-mini-Tn7T-GW-*lacPO-luxCDABE* is a plasmid for directional cloning of promoters to generate *Photorhabdus luminescens* luciferase transcriptional fusions [1]. It contains an *E. coli* lactose operon promoter (*lacPO*) fragment flanked by *Dra*III sites that directs lactose (or IPTG) inducible *luxCDABE* operon expression. The 3-nucleotide ambiguity in the *Dra*III recognition sites (5'-CACTATGTG and 5'-CACCGCGTG) can be used for directional cloning of promoter-containing DNA fragments in place of the *lacPO* fragment. The *lacPO*-containing fragment of pUC18-mini-Tn7T-GW-*lacPO-luxCDABE* was replaced with the *P. aeruginosa* gene PA4974 promoter ( $P_{PA4974}$ ) containing 475-bp *Dra*III fragment from pPS2305 (**Table S1**) to generate pUC18-mini-Tn7T- $P_{PA4974}$ -*lux*. (The PA4974 promoter was identified in Xen5 which is a previously isolated *P. aeruginosa* strain which contains a mini-Tn5-*luxCDABE* insertion in the PA4974

gene whose promoter drives *lux* operon expression [2].) Next, a 806-bp cassette containing the R6K origin of replication (*ori*<sub>R6K</sub>) and *oriT* was released from pPS2836 by digestion with *Sma*I and ligated with the *Bsr*BI digested backbone of pUC18-mini-Tn7T-*P*<sub>PA4974</sub>-*lux* replacing the pUC origin of replication and the ampicillin resistance-encoding *bla* gene to create pTn7xLuxG0 (**Additional Fig. 1**). This plasmid contains the mini-Tn7T-*P*<sub>PA4974</sub>-*lux* element with a gentamicin resistance selection marker (*aacC1*).

**Construction of third generation plasmids.** The construction of third generation plasmids originating from pTn7xLuxG0 is illustrated in **Additional Fig. 1**. First, we attempted to remove an extraneous *Xba*I site outside the multiple cloning site proximal *FRT* site of pTn7xLuxG0 by partial restriction digestion with *Bam*HI, followed by plasmid re-circularization and *Pst*I digest to remove background, creating pTn7xLuxG3. However, it was later determined that only the region between two *Pst*I sites residing in the multiple cloning site was removed. Thus, replacement of the gentamicin resistance marker of pTn7xLuxG3 with the *nptII*-encoded kanamycin resistance marker from pFKM4 [3] on an *Xba*I fragment resulted in the loss of one of the *FRT* sites flanking *nptII* in each resulting third generation vector (e.g. pTn7xLuxK3, pTn7oLuxK3, pTn7tLuxK3 and pTn5/7LuxK3).

The mini-Tn5/7-*lux* vector pTn5/7LuxK3 was created by *Dra*III+*Stu*I digestion of pTn7xLuxK3, followed by ligation with a *Dra*III-*Stu*I fragment containing the Tn5 transposase encoding *tnpA* gene flanked by Tn5 mosaic ends, replacing *P*<sub>PA4974</sub>. The *tnpA* gene and ME-containing fragment was PCR amplified from pLG107 on a 1,978-bp fragment with primer pair 2427 & 2428. Clones containing *tnpA* were screened for by a significant loss of luminescence due to *P*<sub>PA4974</sub> deletion and confirmed by a *Dra*III+*Stu*I restriction digest.

The *P*<sub>ompA</sub> and *P*<sub>tolC</sub> containing pTn7oLuxK3 and pTn7tLuxK3 derivatives of pTn7oLuxK3 were derived by replacing *P*<sub>PA4974</sub> with *P*<sub>ompA</sub> and *P*<sub>tolC</sub>, both of which were isolated on fragments obtained by PCR from

*B. pseudomallei* strain K96243 [4] chromosomal DNA using primer pairs 2378 & 2379 and 2380 & 2381, respectively. Directed  $P_{PA4974}$  replacement was achieved by incorporating *Dra*III sites with matching 3-nucleotide ambiguities to those on the vector on either side of the promoter-containing fragments.

To remove the unwanted *Xba*I site from pTn7xLuxG0,  $P_{ompA}$  was cloned into pTn7xLuxG0 to replace  $P_{PA4974}$  and its resident *Bam*HI site creating pTn7oLuxG0. The *Xba*I site was then removed by *Bam*HI digestion, followed by religation which created pTn7oLuxG4. Next, the gentamicin resistance marker was replaced by deleting the '*FRT-aacC1-FRT*' *Xba*I fragment with '*FRT-nptII-FRT*' (encoding neomycin phosphotransferase II) or '*FRT-dhfrII-FRT*' *Xba*I (encoding trimethoprim resistant dihydrofolate reductase II) fragments from pFKM2 [5] and pFTP2, respectively, creating pTn7oLuxK4 and pTn7oLuxT4. (The '*FRT*' and '*FRT*' indicate truncated *FRT* sites since *Xba*I cleaves within the *FRT* sequences.) The series of fourth generation of vectors was completed by constructing pTn5/7LuxG4, pTn5/7LuxK4 and pTn5/7LuxT4. This was achieved by replacing  $P_{ompA}$  with a 1,783-bp *Stu*I-*Dra*III fragment carrying the Tn5 transposase *tnpA* gene flanked by the Tn5 mosaic ends. The *tnpA* gene is located upstream of the *lux* operon and oriented in the opposite orientation. Replacement of  $P_{ompA}$  was confirmed by loss of luminescence and *Dra*III+*Stu*I digests.

The construction of a fifth generation of vectors focused solely on the Tn5/7Lux plasmids. To increase *tnpA* transcription, the *B. thailandensis* ribosomal  $P_{S12}$  promoter was added to the *Eco*RI restriction site near the 5' end of the *tnpA* gene via linker tailing using oligonucleotides 2493 and 2494, creating pTn5/7LuxK5 and pTn5/7LuxT5 from pTn5/7LuxK4 and pTn5/7LuxT4, respectively. Insertion of  $P_{S12}$  was confirmed by sequencing. (The version containing a gentamicin marker was not pursued due to unexpected behavior of the vector, such as only being replicated in strains containing the *pir-116*<sup>+</sup> but not *pir*<sup>+</sup> allele.)

The sixth generation vector series originated from pTn5/7LuxT5. An *attB1* site was inserted into the *DraIII* site upstream of the *lux* operon via linker tailing with oligonucleotides 2540 and 2541 to allow for Gateway recombination for exchange of the *lux* operon with other genetic elements (an *attB2* site already existed downstream of *lux*). The insertion event creating pTn5/7LuxT6 was confirmed by sequencing. The remaining plasmids of this series – pTn5/7LuxK6, pTn5/7LuxG6 and pTn5/7LuxTc6 – were then derived from pTn5/7LuxT6 by replacing its *XbaI*-liberated ‘*FRT-dhfRII-FRT*’ resistance cassette with ‘*FRT-nptII-FRT*’, ‘*FRT-aacC1-FRT*’ and ‘*FRT-tetA-FRT*’ cassettes from *XbaI*-digested pFKM2, pFGM1 and pFTC2, respectively.

**Construction of empty mini-Tn7 delivery vectors.** Three empty mini-Tn7 delivery vectors were constructed. To accomplish this, primer pair 2421 and 2422 was used to amplify the pTn7xLuxG3 backbone, excluding the *lux* operon, and add *PstI* sites to either side of the amplicon. The amplified backbone was re-circularized to create pTn7xG (**Additional Fig. 2**). To replace the ‘*FRT-aacC1-FRT*’ cassette, pTn7xG DNA was digested with *XbaI* and ligated with *XbaI* ‘*FRT-nptII-FRT*’ and ‘*FRT-dhfRII-FRT*’ fragments from pFKM4 and pFTP2 to derive pTn7xK and pTn7xT, respectively. These new mini-Tn7 vectors contain unique restriction sites for cloning of cargo segments and the gentamicin, kanamycin and trimethoprim selection markers facilitate transposition selection in a broad-range of Gram-negative bacteria.

**Multiplex PCR for detection of *B. pseudomallei* mini-Tn7 *attTn7* insertions.** Because *B. pseudomallei* contains three *glmS*-associated *attTn7* sites, the traditional method for determining the mini-Tn7 insertion sites involved three separate PCR reactions employing a Tn7-specific primer and three chromosome-specific primers [5]. To streamline the insertion site detection method we developed a multiplex PCR using the primer set P479 & 1510 & 2595 & 2596. DNA templates used were obtained using colony boiling preparations. Briefly, individual colonies were transferred to 30 µl of sterile distilled

and deionized water and the cell suspension was boiled for 10 min. The resulting lysates were then centrifuged for 30 s at 12,000×g at room temperature in a microcentrifuge and the supernatants transferred to a clean microcentrifuge tube. Six µl of supernatant were used as template in 50 µl PCR mixes containing 30 pmoles of primers 479, 1510 and 2596 and 7.5 pmoles of primer 2595 in addition to *Taq* DNA polymerase (New England Biolabs). The PCR conditions employed were an initial denaturation step at 95°C for 2 min, 30 cycles of 95°C for 30 s, 61.2°C for 30 s and 72°C for 30 s, a final elongation step at 72°C for 10 min, followed by a hold at 8°C. Twenty µl aliquots of the PCR reaction mixtures were analyzed on a 1% agarose gel in TAE running buffer [6]. **Additional Fig. 3** is a representative example of multiplex PCR results.

#### **Additional references**

1. Moir DT, Di M, Opperman T, Schweizer HP, Bowlin TL: **A high-throughput, homogenous, bioluminescent assay for *Pseudomonas aeruginosa* gyrase inhibitors and other DNA damaging agents.** *J Biomol Scr* 2007, **12**:855-864.
2. Kadurugamuwa JL, Sin L, Albert E, Yu J, Francis K, DeBoer M, Rubin M, Bellinger-Kawahara C, Parr Jr TR, Jr., Contag PR: **Direct continuous method for monitoring biofilm infection in a mouse model.** *Infect Immun* 2003, **71**:882-890.
3. Kvitko BH, Bruckbauer S, Prucha J, McMillan I, Breland EJ, Lehman S, Mladinich K, Choi KH, Karkhoff-Schweizer R, Schweizer HP: **A simple method for construction of *pir*<sup>+</sup> Enterobacterial hosts for maintenance of R6K replicon plasmids.** *BMC Res Notes* 2012, **5**:157.
4. Holden MTG, Titball RW, Peacock SJ, Cerdeno-Tarraga AM, Atkins TP, Crossman LC, Pitt TL, Churcher C, Mungall KL, Bentley SD *et al*: **Genomic plasticity of the causative agent of melioidosis, *Burkholderia pseudomallei*.** *Proc Natl Acad Sci USA* 2004, **101**:14240-14245.
5. Choi K-H, Mima T, Casart Y, Rholl D, Kumar A, Beacham IR, Schweizer HP: **Genetic tools for select agent compliant manipulation of *Burkholderia pseudomallei*.** *Appl Env Microbiol* 2008, **74**:1064-1075.
6. Sambrook J, Russell DW: **Molecular Cloning**, Third edn. Cold Spring Harbor, NY: Cold Spring Harbor Laboratory Press; 2001.

7. Choi K-H, Gaynor JB, White KG, Lopez C, Bosio CM, Karkhoff-Schweizer RR, Schweizer HP: **A Tn7-based broad-range bacterial cloning and expression system.** *Nat Methods* 2005, **2**:443-448.
8. Waddell, CS, Craig NL: **Tn7 transposition: Recognition of the attTn7 target sequence.** *Proc Natl Acad Sci USA* 1989, **86**:3958-3962.

**Additional table 1. Auxiliary plasmids used for vector construction**

| <b>Plasmid</b> | <b>GenBank<br/>Accession #</b> | <b>Pertinent features<sup>a</sup></b>                                                                                                                                                                                 | <b>Source</b> |
|----------------|--------------------------------|-----------------------------------------------------------------------------------------------------------------------------------------------------------------------------------------------------------------------|---------------|
| pFGM1          | AY597270                       | Ap <sup>r</sup> , Gm <sup>r</sup> ; source of <i>FRT-aacC1-FRT</i><br>gentamicin resistance gene cassette                                                                                                             | [7]           |
| pFKM2          | EU215433                       | Ap <sup>r</sup> , Km <sup>r</sup> ; source of <i>FRT-nptII-FRT</i><br>kanamycin resistance gene cassette                                                                                                              | [5]           |
| pFKM4          | JX504717                       | Ap <sup>r</sup> , Km <sup>r</sup> ; source of <i>FRT-nptII-FRT</i><br>kanamycin resistance gene cassette                                                                                                              | [3]           |
| pFTP1          | AY712951                       | Ap <sup>r</sup> , Tp <sup>r</sup> ; source of <i>FRT-dhfRII-FRT</i><br>trimethoprim resistance gene cassette                                                                                                          | [7]           |
| pFTP2          | KF532953                       | Ap <sup>r</sup> , Tp <sup>r</sup> ; source of <i>FRT-dhfRII-FRT</i><br>trimethoprim resistance gene cassette; extra<br><i>XbaI</i> site within cassette removed by site-<br>directed mutagenesis (TCTAGA →<br>CCTAGA) | This study    |
| pFTC1          | AY712950                       | Ap <sup>r</sup> , Tc <sup>r</sup> ; source of <i>FRT-tetA-FRT</i><br>tetracycline resistance gene cassette                                                                                                            | [7]           |
| pFTC2          | KF532952                       | Ap <sup>r</sup> , Tc <sup>r</sup> ; source of <i>FRT-tetA-FRT</i><br>tetracycline resistance gene cassette; extra<br><i>XbaI</i> site within cassette removed by site-<br>directed mutagenesis (TCTAGA →<br>CCTAGA)   | This study    |
| pLG107         | N/A                            | Ap <sup>r</sup> , Km <sup>r</sup> ; Tn5 delivery vector; source of                                                                                                                                                    | Colin         |

|            |          |                                                                                                                                                                                                                                                   |                                        |
|------------|----------|---------------------------------------------------------------------------------------------------------------------------------------------------------------------------------------------------------------------------------------------------|----------------------------------------|
|            |          | Tn5 mosaic ends and <i>tnpA</i> encoded transposase                                                                                                                                                                                               | Manoil,<br>University of<br>Washington |
| pPS2305    | KF532954 | Ap <sup>r</sup> ; source of <i>P</i> <sub>PA4074</sub> ; pCR2.1 (Invitrogen) with 474-bp <i>Dra</i> III- <i>P</i> <sub>PA4974</sub> - <i>Dra</i> III PCR fragment obtained with <i>P. aeruginosa</i> PAO1 chromosomal DNA and primers 1630 & 1631 | This Study                             |
| pPS2836    | KF532955 | Ap <sup>r</sup> ; source of <i>ori</i> <sub>R6K</sub> - <i>oriT</i> cassette; pCR2.1 with 817-bp PCR fragment obtained with pUC18R6KT-mini-Tn7T DNA and primers 2298 & 2299                                                                       | This study                             |
| pTn7xLuxG0 | KF532964 | Gm <sup>r</sup> ; <i>luxCDEBA</i> operon transcribed from <i>P</i> <sub>PA4974</sub> contained on <i>Dra</i> III fragment                                                                                                                         | This Study                             |
| pTn7oLuxG0 | KF532961 | Gm <sup>r</sup> ; <i>Dra</i> III fragment containing <i>P</i> <sub>PA4974</sub> replaced with <i>Dra</i> III fragment containing <i>P</i> <sub>ompA</sub>                                                                                         | This Study                             |
| pTn7xG     | KF813058 | Gm <sup>r</sup> ; pTn7xLuxG3 (Genbank accession no. KF532965) backbone amplified without <i>luxCDABE</i> operon; mini-Tn7 delivery vector                                                                                                         | This Study                             |
| pTn7xK     | KF813059 | Km <sup>r</sup> ; pTn7xG with Gm <sup>r</sup> encoding <i>aacCI</i> gene replaced with Km <sup>r</sup> encoding <i>nptII</i> gene from pFKM4                                                                                                      | This Study                             |



|                        |          |                                                                                                                                                                                                             |            |
|------------------------|----------|-------------------------------------------------------------------------------------------------------------------------------------------------------------------------------------------------------------|------------|
| pTn7xT                 | KF813060 | Tp <sup>R</sup> ; pTn7xG with Gm <sup>r</sup> encoding <i>aacC1</i> gene replaced with Tp <sup>r</sup> encoding <i>dhfRII</i> gene from pFTP2                                                               | This Study |
| pUC18R6KT-mini-Tn7T    | AY712953 | Ap <sup>r</sup> ; mini-Tn7T delivery vector                                                                                                                                                                 | [7]        |
| pUC18R6KT-mini-Tn7T-Km | KF532956 | Ap <sup>r</sup> Km <sup>r</sup> ; the released Km <sup>r</sup> ( <i>FRT-nptII-FRT</i> ) encoding fragment from <i>Eco53KI</i> - digested pFKM2 was ligated with <i>EcoRV</i> -digested pUC18R6KT-mini-Tn7T. | This Study |

<sup>a</sup>Abbreviations: Ap, ampicillin; Gm, gentamicin; Km, kanamycin; Tc, tetracycline; Tp, trimethoprim;

*FRT*, Flp recombinase target.

**Additional table 2. Oligonucleotides used in vector construction and Tn7 insertion determination**

| <b>Oligo Name</b> | <b>Description</b> | <b>Sequence (5' → 3')<sup>a</sup></b>                              |
|-------------------|--------------------|--------------------------------------------------------------------|
| 479               | Tn7L               | ATTAGCTTACGACGCTACACCC                                             |
| 1510              | BPGLMS2            | ACACGACGCAAGAGCGGAATC                                              |
| 1630              | Xen5-Up            | <u>CACTATGTGATCGATGGCTCTCCTGGGTG</u>                               |
| 1631              | Xen5-DW            | <u>CACCGCGTGTGTTTCGTCCTGGAAAAGATGC</u>                             |
| 2298              | SmaI-R6KoriT-F     | ATT <u>CCCGGGAGGCC</u> ACCACTTCAAGAACTC                            |
| 2299              | Sma-R6KoriT-R      | TAAT <u>CCCGGGCTTCCGCTT</u> CCTCGCTCA                              |
| 2378              | DraIIIompA-UP      | TAAC <u>ACTATGTGAGACCGATGTTAGGGTGGGG</u>                           |
| 2379              | DraIIIompA-DN      | TAAC <u>ACCGCGTGTGAGATTACCGCAGGTTTACTG</u>                         |
| 2380              | DraIIItoIC-UP      | TAAC <u>ACTATGTGGCGATTACAAGCCGGAATCAGGCT</u><br>ATCATGCACTCAAGTTG  |
| 2381              | DraIIItoIC-DN      | TAAC <u>ACCGCGTGGGTGAATTCAGGATCGTCAAAAAC</u><br>CGATATAAGACGGGACCG |
| 2421              | Tn7xFGmPstI-UP     | ATAA <u>CTGCAGCACCGCGTGTGTCGTTTCGTCCTG</u>                         |
| 2422              | Tn7xFGmPstI-DN     | ATAA <u>CTGCAGCTTTGCCTAATTGTAAGTGGA</u>                            |
| 2427              | Stu-ME-TnpA-for    | TAAAGGCCT <u>AGATGTGTATAAAGAGACAGACTCTTCC</u><br>TTTTTCAATATTATTG  |
| 2428              | DraIII-ME-tnpA-rev | TAAC <u>ACCGCGTGAGATGTGTATAAAGAGACAGGAATTC</u>                     |
| 2493              | S12-Fwd            | AATTCTTGACTCACTTGGGATTTTCGGAATATCATG                               |
| 2494              | S12-Rev            | AATTCATGATATTCCGAAAATCCCAAGTGAGTCAAG                               |
| 2540              | DraIIIattB1 F      | GTGACAAGTTTGTACAAAAAAGCAGGCTGCG                                    |

|      |              |                                 |
|------|--------------|---------------------------------|
| 2541 | DraIIIattB1R | AGCCTGCTTTTTTGTACAAACTTGTCACCGC |
| 2595 | BPGLMS1-New4 | ACCTGATTGCGTTCGTCGTCC           |
| 2596 | BPGLMS3-New  | ATCACGCTGCTTTGGCTGG             |

<sup>a</sup>Restriction sites are underlined: *Dra*III (1630, 1631, 2738, 2739, 2380, 2381, 2428); *Pst*I (2421 and 2422); *Sma*I (2298, 2299); *Stu*I (2427). The Tn5 mosaic end sequences in oligonucleotides 2427 and 2428 are bolded.

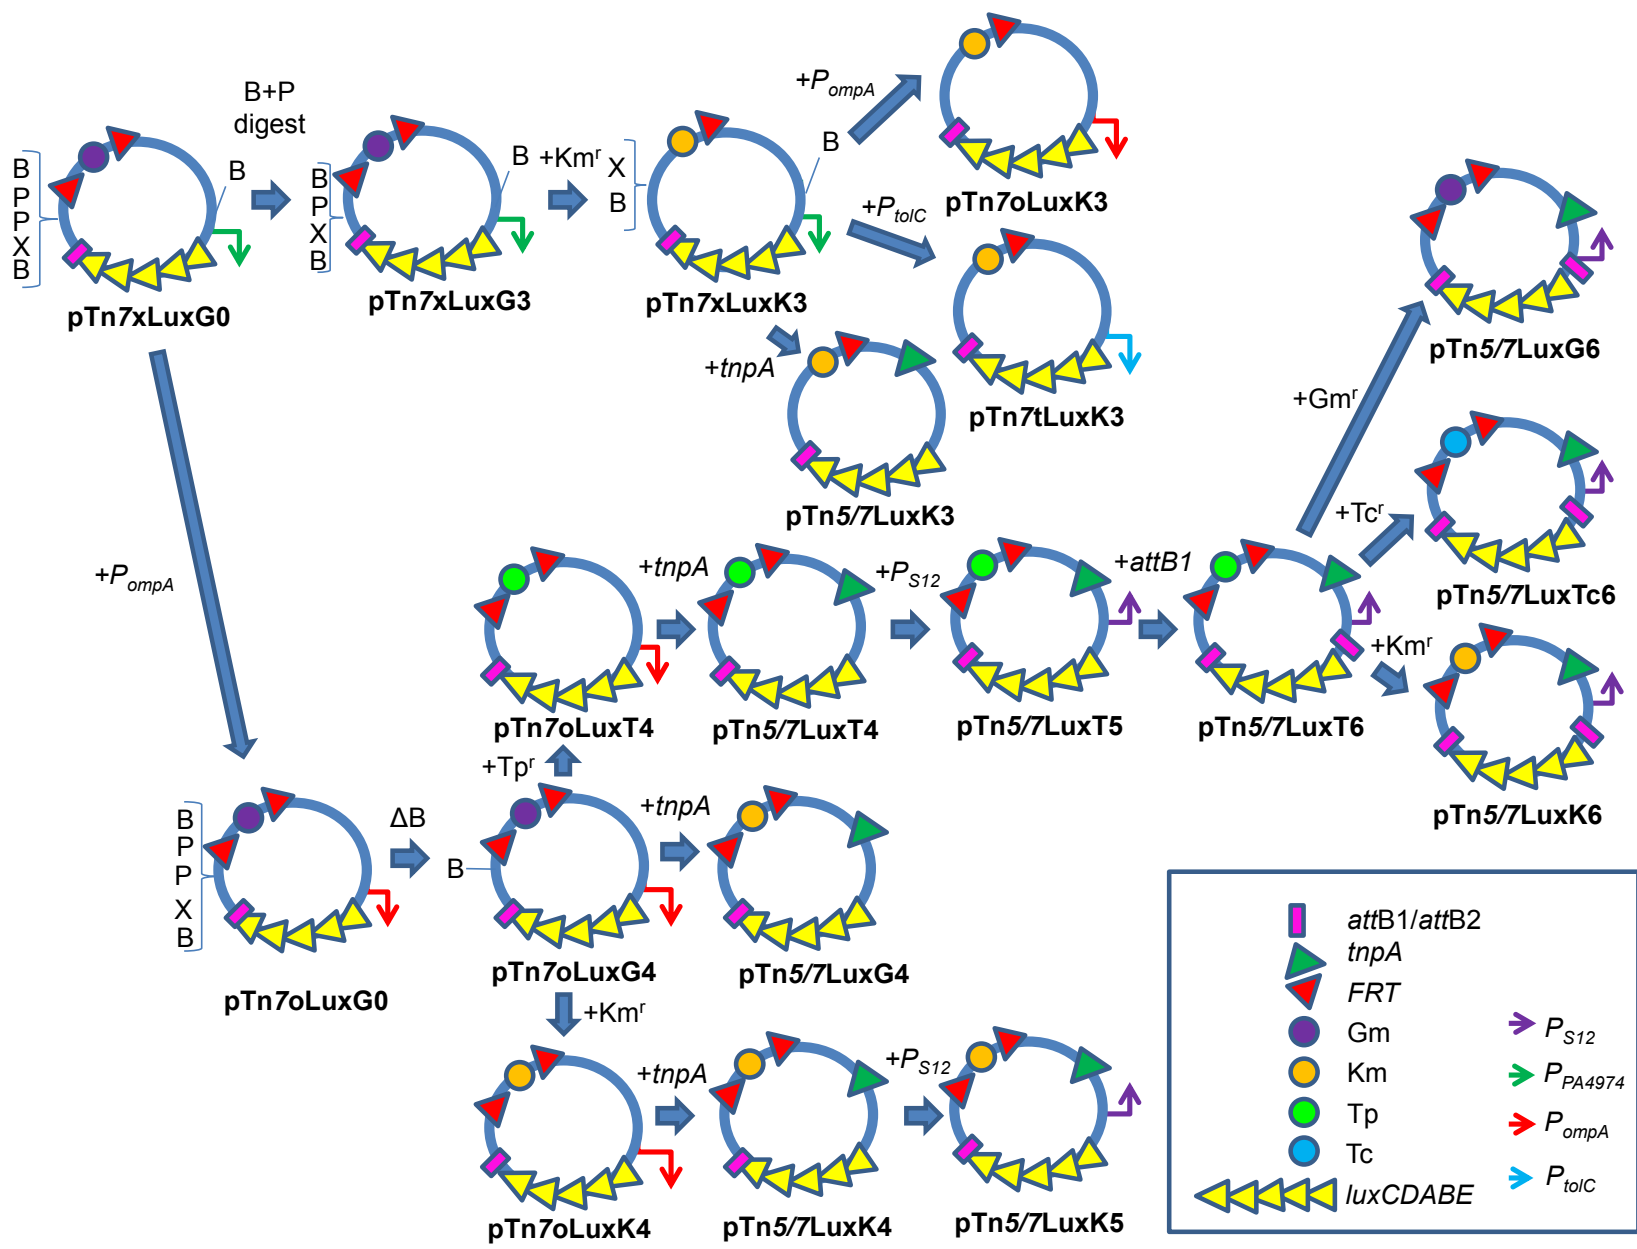

**Additional figure 1. Genealogy of mini-Tn7-*lux* and mini-Tn5/7-*lux* vector creation from pTn7xLuxG0.** Plasmid nomenclature indicates what the respective vectors carry and the generation they belong to. For example capital letters G, K, T and Tc indicate gentamicin, kanamycin, trimethoprim and tetracycline resistance markers used for either mini-Tn5/7-*lux* or mini-Tn7-*lux* transposition selection. Letters 3 to 6 indicate vector generation and lower case letters o, t and x indicate the *B. pseudomallei ompA* ( $P_{ompA}$ ), *B. pseudomallei tolC* ( $P_{tolC}$ ) and *P. aeruginosa PA4974* ( $P_{PA4974}$ ) promoters, respectively. Letters B, P and X indicate *Bam*HI, *Pst*I and *Xba*I restriction sites. B+P denotes a *Bam*HI partial and *Pst*I complete restriction digest and  $\Delta$ B indicates a *Bam*HI deletion. Steps marked with +Gm<sup>r</sup>, +Km<sup>r</sup>, +Tp<sup>r</sup> and +Tc<sup>r</sup> indicate replacement of the resident resistance marker with gentamicin (*aacC1*), kanamycin (*nptII*), trimethoprim (*dhfR1I*) and tetracycline (*tetA*) resistance markers. Steps marked with +*tnpA* indicate addition of the Tn5 transposase gene with flanking Tn5 mosaic ends and steps marked with +*attB1* mark addition of a bacteriophage  $\lambda$  *attB1* recombination site. Steps marked with + $P_{S12}$  indicate insertion of a *B. thailandensis* ribosomal S12 gene promoter. Transcription directions from promoters are indicated with an arrow. Color coding of genetic elements is explained in the insert box.

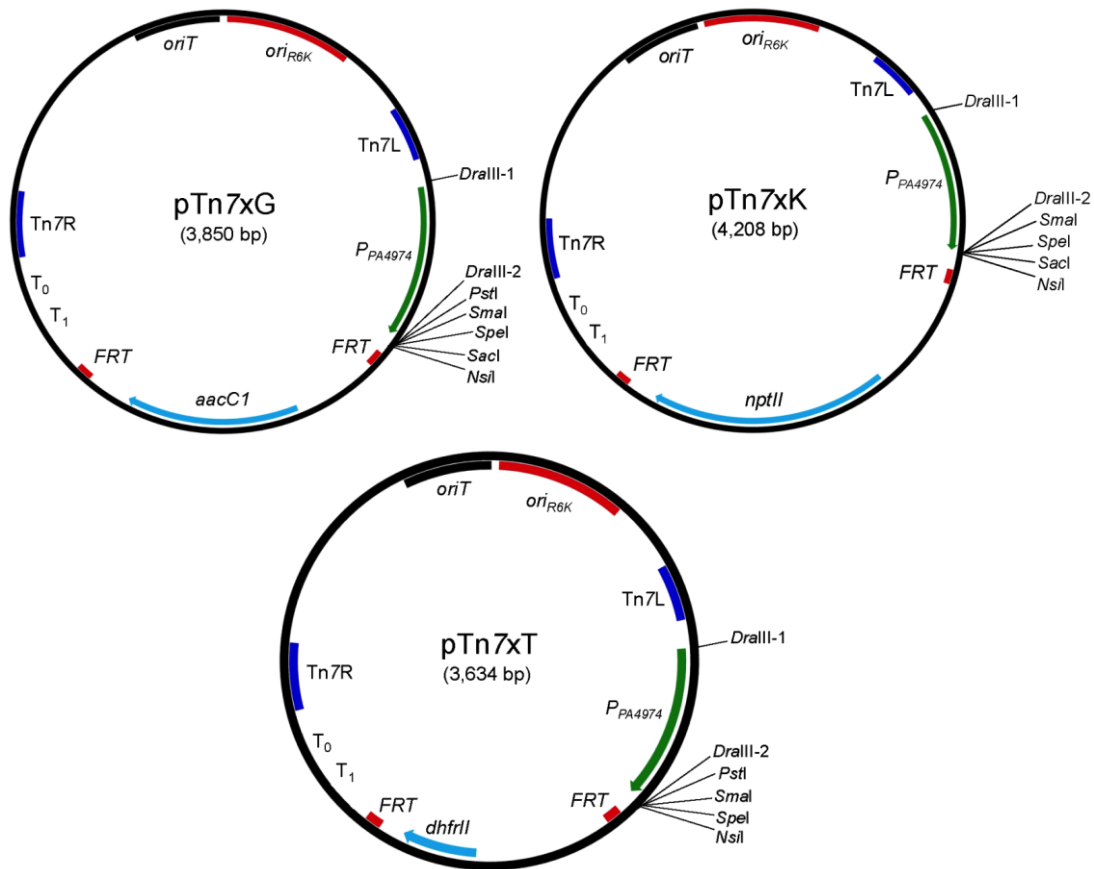

**Additional figure 2. Maps of mini-Tn7 delivery vectors.** The mini-Tn7 elements on these delivery vectors are flanked by the Tn7 left (Tn7L) and right (Tn7R) ends and contain either an *aacC1*-encoded gentamicin resistance marker (pTn7xG), a *nptII*-encoded kanamycin resistance marker (pTn7xK) or a *dhfrII*-encoded trimethoprim resistance marker (pTn7xT). The resistance genes are flanked by Flp recombinase targets (*FRT*). The mini-Tn7 element also contains the transcriptional terminators T<sub>0</sub> and T<sub>1</sub> from bacteriophage  $\lambda$  and *E. coli rrrB* operon, respectively, and the promoter from the *P. aeruginosa* PA4974 gene (*P<sub>PA4974</sub>*). The plasmid backbone contains the R6K origin of replication (*ori<sub>R6K</sub>*) and an origin of conjugative transfer (*oriT*). Unique restriction sites for cloning of cargo fragments are shown. The two *DraIII* sites contain a 3-nucleotide ambiguity in the recognition sites (*DraIII*-1 5'-CACTATGTG and *DraIII*-2 5'-CACCGCGTG) and aside from deletion of *P<sub>PA4974</sub>* can therefore also be used for directional cloning of promoter-containing DNA fragments for transcription of cargo genes.

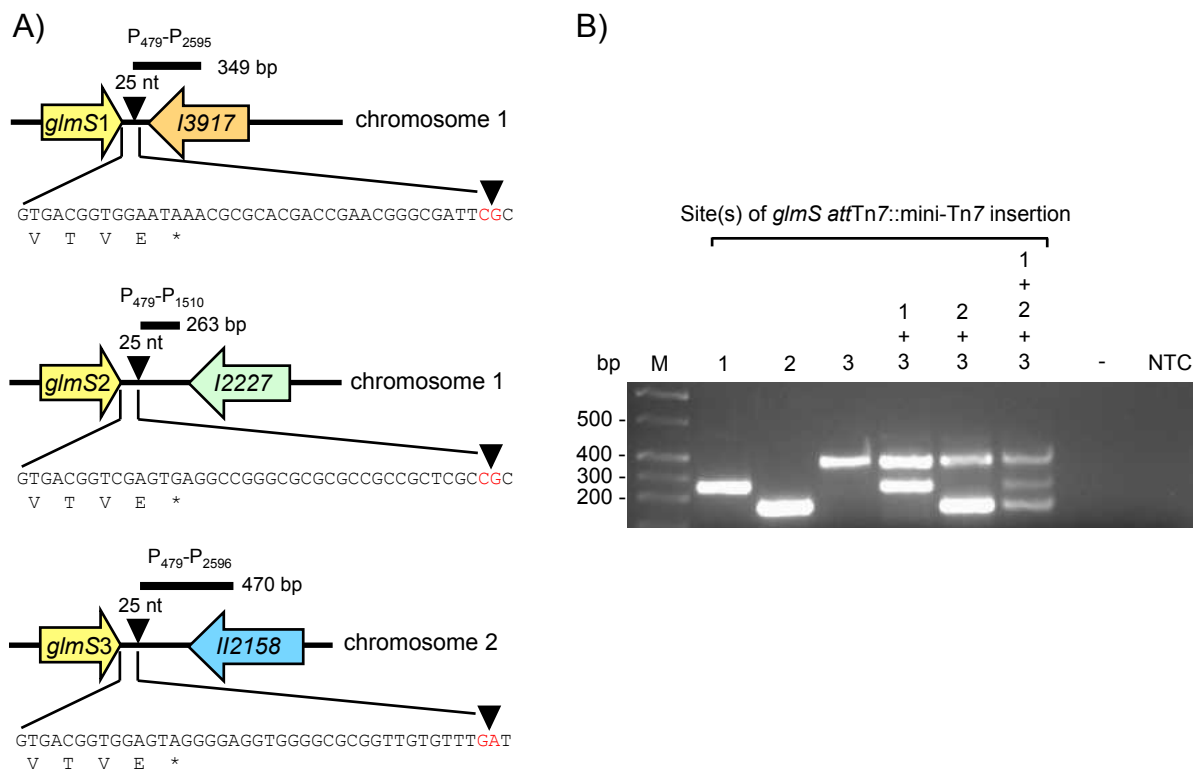

**Additional figure 3. Tn7 insertion at multiple sites in *B. pseudomallei* and detection by multiplex PCR.** (A) Insertion occurs at three possible *glmS*-linked *attTn7* sites, two on chromosome 1 and one on chromosome 2, but >65% of observed insertions occur at the *glmS2*-associated site on chromosome 1. Although the *attTn7* target sequences are located within the last 40 nucleotides of the *glmS* coding sequences Tn7 elements insert 25 nucleotides (25 nt) downstream of the respective *glmS* gene in the *glmS*-downstream gene intergenic region [8]. The downstream genes are labeled with the short form of their respective strain Bp82 annotations as BP1026B\_I3917, BP1026B\_I2227 and BP1026B\_II2158. The sequences shown include the last five codons of the respective *glmS* genes and the Tn7 insertion sites marked by triangles and nucleotides in red type. Expected PCR fragment sizes (taking into account the 5 bp insertion site duplication [8]) are indicated by horizontal bars, which are labeled with primer pairs used for amplification and fragment sizes. (B) Representative multiplex PCR results of verification of mini-Tn7 insertion at one or multiple *B. pseudomallei* genomic insertion sites. Lanes labeled 1, 2 and 3 indicate mini-Tn7 insertion at *glmS1*-, *glmS2*- or *glmS3*-associated *attTn7* sites. Combinations of numbers indicate insertions at multiple *attTn7* sites. For example, 1+2+3 indicates insertions at all three sites. **Other lanes:** -, DNA from Bp82.27 host strain without mini-Tn7 insertion; NTC, no template control. The lane labeled M contained Hi-Lo molecular weight markers from Minnesota Molecular (Minneapolis, MN).
